# Supplementary material for: Integrated transcriptomic and proteomic analysis of Tritipyrum provides insights into the molecular basis of salt tolerance
Source: PeerJ journal article supplement (doi:10.7717/peerj.12683), 2021-12-23
Supplement: Raw_data.zip [file Raw_data.zip]

## Sheet: SYBR
		1	2	3	4	5	6	7	8	9	10	11	12
A	Content	T1	T1	T1	T1	T1	T1	T1	T1	T1	Unkn	Unkn	Unkn
A	Sample	Actin11	Actin11	Actin11	Actin11	Actin11	Actin11	Actin11	Actin11	Actin11
A	Cq	15.5674	16.5091	16.9612	15.291	16.5614	15.5484	15.75	15.2807	15.5464
A	copy number
B	Content	CK1	CK1	CK1	CK1	CK1	CK1	CK1	CK1	CK1	Unkn	Unkn	Unkn
B	Sample	Actin11	Actin11	Actin11	Actin11	Actin11	Actin11	Actin11	Actin11	Actin11
B	Cq	15.2661	15.1073	14.6556	15.1104	14.1344	14.1558	14.3274	14.2066	14.4743
B	copy number
C	Content	T2	T2	T2	T2	T2	T2	T2	T2	T2	Unkn	Unkn	Unkn
C	Sample	Actin11	Actin11	Actin11	Actin11	Actin11	Actin11	Actin11	Actin11	Actin11
C	Cq	12.464	12.3637	12.0746	12.4002	12.0884	12.042	12.3754	12.4581	12.1636
C	copy number
D	Content	CK2	CK2	CK2	CK2	CK2	CK2	CK2	CK2	CK2	Unkn	Unkn	Unkn
D	Sample	Actin11	Actin11	Actin11	Actin11	Actin11	Actin11	Actin11	Actin11	Actin11
D	Cq	12.1271	11.9105	12.1626	12.1854	11.9852	11.8555	11.4695	11.4419	11.8498
D	copy number
E	Content	T1	T1	T1	T1	T1	T1	T1	T1	T1	Unkn	Unkn	Unkn
E	Sample	Actin13	Actin13	Actin13	Actin13	Actin13	Actin13	Actin13	Actin13	Actin13
E	Cq	28.4712	28.5584	28.5416	28.2197	28.3047	28.3129	28.7347	28.6958	28.6591
E	copy number
F	Content	CK1	CK1	CK1	CK1	CK1	CK1	CK1	CK1	CK1	Unkn	Unkn	Unkn
F	Sample	Actin13	Actin13	Actin13	Actin13	Actin13	Actin13	Actin13	Actin13	Actin13
F	Cq	29.739	28.2696	28.6084	29.3451	28.0124	28.192	28.192	28.5004	28.1429
F	copy number
G	Content	T2	T2	T2	T2	T2	T2	T2	T2	T2	Unkn	Unkn	Unkn
G	Sample	Actin13	Actin13	Actin13	Actin13	Actin13	Actin13	Actin13	Actin13	Actin13
G	Cq	28.6591	28.7484	29.1495	28.7347	28.6958	29.171	28.5557	28.4887	28.2366
G	copy number
H	Content	CK2	CK2	CK2	CK2	CK2	CK2	CK2	CK2	CK2	Unkn	Unkn	Unkn
H	Sample	Actin13	Actin13	Actin13	Actin13	Actin13	Actin13	Actin13	Actin13	Actin13
H	Cq	27.42	27.2855	27.7323	27.272	27.5286	27.8044	27.3635	27.6345	27.2162
H	copy number

## Sheet: Run Information
File Name	admin_2020-12-11 17-03-01_CT021297.pcrd
Created By User	admin
Notes
ID
Run Started	12/11/2020 09:03:13 UTC
Run Ended	12/11/2020 10:15:04 UTC
Sample Vol	20
Lid Temp	105
Protocol File Name	CFX_2StepAmp+Melt.prcl
Plate Setup File Name	QuickPlate_96 wells_All Channels.pltd
Base Serial Number	CT021297
Optical Head Serial Number	785BR14273
CFX Manager Version	3.1.1517.0823.
