# Supplementary material for: Integrated transcriptomic and proteomic analysis of Tritipyrum provides insights into the molecular basis of salt tolerance
Source: PeerJ. 2021 Dec 23;9:e12683. doi: 10.7717/peerj.12683 (PMC8710252; doi:10.7717/peerj.12683)
Supplement: Supplemental Information 5 [file peerj-09-12683-s005.xlsx]

## Sheet: Sheet1
Table S5 The GO terms or KEGG pathways of important DEGs in ‘Y1805’ under salt stress and recovery conditions
Protein ID	GO term	GO ID	Pathway level 2	Pathway ID	Protein name	Functional categories	Log2FC
Salt stress
TraesCS1B01G096300.1	Antioxidant activity	GO:0004601	Biosynthesis of other secondary metabolites	ko00940	AT1G14550	-	1.07439
TraesCS2B01G616700.1	Antioxidant activity	GO:0004601	Biosynthesis of other secondary metabolites	ko00940	AT4G33420	-	-1.3635
TraesCS2A01G502100.1	Antioxidant activity	GO:0004601	Biosynthesis of other secondary metabolites	ko00940	AT4G37520	-	-1.22109
TraesCS3A01G093900.1	Molecular function regulator	GO:0004867	-		EMT04243	-	1.37961
TraesCS2A01G102600.1	Catalytic activity	GO:0003824	-		IRX1	-	-1.01742
TraesCS2D01G377600.1	-		Biosynthesis of other secondary metabolites	ko00940	PAL1	Secondary metabolites biosynthesis, transport and catabolism	1.19911
TraesCS1B01G136200.1	Catalytic activity	GO:0003824	-		CESA1	-	-1.08964
TraesCS2A01G292000.1	Catalytic activity	GO:0003824	Amino acid metabolism	ko00360	ADT6	Amino acid transport and metabolism	1.4703
TraesCS7A01G204500.1	Catalytic activity	GO:0003824	Carbohydrate metabolism	ko00052	GH9B13	-	-1.17918
TraesCS1A01G089500.1	Catalytic activity	GO:0003824	Amino acid metabolism	ko00360	EFE	Secondary metabolites biosynthesis, transport and catabolism	1.19441
TraesCS3A01G092800.1	Response to stimulus	GO:0009611	Carbohydrate metabolism	ko00052	RFS1	-	2.7788
TraesCS3B01G045500.1	Binding	GO:0005488	Environmental adaptation	ko04626	CML16	Signal transduction mechanisms	1.34901
TraesCS1A01G087900.1	Binding	GO:0005488	-		CHR12	Transcription	4.05716
TraesCS2A01G161200.1	Catalytic activity	GO:0003824	Carbohydrate metabolism	ko00052	TPP3	Carbohydrate transport and metabolism	1.0136
TraesCS1D01G369800.1	-		Transport and catabolism	ko04144	HVA1	Function unknown	2.10852
TraesCS6A01G169200.1	Catalytic activity	GO:0003824	-		CSLA01	-	-1.91129
TraesCS7A01G204500.1	Catalytic activity	GO:0003824	Carbohydrate metabolism	ko00052	GH9B13	-	-1.17918
Recovery
TraesCS6B01G254000.1	Virion	GO:0005634	Translation	ko03010	NOP10	RNA processing and modification	-1.40128
TraesCS1A01G251000.1	Metabolic process	GO:0008152	Amino acid metabolism	ko00360	APG10	Amino acid transport and metabolism	-1.42481
TraesCS1B01G098300.2	Binding	GO:0005488	-		APG3	Translation, ribosomal structure and biogenesis	1.41825
TraesCS4A01G266900.1	-		Energy metabolism	ko00920	GSR2	Amino acid transport and metabolism	1.12591
TraesCS6A01G088200.2	Catalytic activity	GO:0003824	Carbohydrate metabolism	ko00052	AT2G35390	Amino acid transport and metabolism	-1.00006
TraesCS4B01G352400.1	-		Biosynthesis of other secondary metabolites	ko00940	OMT1	General function prediction only	1.0077
TraesCS7A01G262000.1	Antioxidant activity	GO:0004601	Biosynthesis of other secondary metabolites	ko00940	AT5G14130	-	-1.2928
TraesCS7A01G211200.1	Antioxidant activity	GO:0004601	Biosynthesis of other secondary metabolites	ko00940	AT1G68850	-	2.17832
TraesCS1B01G220600.1	Response to stimulus	GO:0009611	Lipid metabolism	ko00561	AT3G28200	-	1.50452
TraesCS7A01G450600.1	Metabolic process	GO:0008152	Translation	ko03010	RPL24	Translation, ribosomal structure and biogenesis	1.73784
TraesCS1D01G105500.1	Metabolic process	GO:0008152	Translation	ko03010	RPL18	Translation, ribosomal structure and biogenesis	1.35873
TraesCS4B01G347400.1	Macromolecular complex	GO:0005854	-		NACA2	Transcription	1.15601
TraesCS7B01G232700.1	Metabolic process	GO:0008152	Amino acid metabolism	ko00360	SPDS1	Amino acid transport and metabolism	1.91051
TraesCS4A01G173800.1	Binding	GO:0005488	Carbohydrate metabolism	ko00052	Xip-R1	Cell wall/membrane/envelope biogenesis	1.18973
TraesCS7B01G273600.1	Catalytic activity	GO:0003824	Biosynthesis of other secondary metabolites	ko00940	AT5G44410	-	1.21725
TraesCS3A01G287400.1	Catalytic activity	GO:0003824	Amino acid metabolism	ko00360	SAT1	Amino acid transport and metabolism	1.08066
TraesCS5A01G234300.1	Catalytic activity	GO:0003824	Amino acid metabolism	ko00360	EFE	Secondary metabolites biosynthesis, transport and catabolism	1.21148
TraesCS4A01G237900.1	Catalytic activity	GO:0003824	Carbohydrate metabolism	ko00052	UGD2	Carbohydrate transport and metabolism	1.55462
TraesCS3A01G330600.1	Metabolic process	GO:0008152	Lipid metabolism	ko00561	GPDHC1	Energy production and conversion	1.09998
TraesCS3B01G283900.1	Catalytic activity	GO:0003824	-		ILL2	-	1.41099
TraesCS3A01G367900.1	Catalytic activity	GO:0003824	-		EPS1	-	1.17428
TraesCS2A01G154400.1	Biological regulation	GO:0004004	Folding, sorting and degradation	ko12598	HEN2	RNA processing and modification	3.90319
TraesCS3A01G130200.1	Catalytic activity	GO:0003824	Transcription	ko03010	DRH1	RNA processing and modification	1.52969
